# Supplementary material for: Effectiveness of Continuous Glucose Monitoring in a Clinical Care Environment: Evidence from the Juvenile Diabetes Research Foundation Continuous Glucose Monitoring (JDRF-CGM) trial
Source: PubMed Central journal article supplement — Diabetes Care. 2009 Oct 16;33(1):17–22. doi: 10.2337/dc09-1502 (PMC2797966; doi:10.2337/dc09-1502), 2009-10-16
Supplement: supp_dc09-1502_dc09-1502_Online_Appendix.pdf [file supp_dc09-1502_dc09-1502_Online_Appendix.pdf]

## Online Appendix

1. Supplemental Table 1
2. Supplemental Table 2
3. Supplemental Table 3
4. Supplemental Table 4
5. Supplemental Table 5
6. Disclosures
7. Study Group Listing

**Supplemental Table 1. Factors Associated with Sensor Use\*  $\geq$  6 Days per Week During Weeks 22-26**

|                                                 | N   | % $\geq$ 6 Days/Wk in Month 6 | Model 1 <sup>†</sup>                       |      |             | Model 2 <sup>‡</sup> |      |             |
|-------------------------------------------------|-----|-------------------------------|--------------------------------------------|------|-------------|----------------------|------|-------------|
|                                                 |     |                               | P-value Unadjusted/ Adjusted for Age Group | OR   | 95% CI      | P value              | OR   | 95% CI      |
| <b>Total</b>                                    | 212 | 79 (37%)                      |                                            |      |             |                      |      |             |
| <b>Age (years)</b>                              |     |                               | <0.001                                     |      |             | <0.001               |      | <0.001      |
| 8-<15                                           | 61  | 15 (25%)                      |                                            | 1.0  |             |                      | 1.0  |             |
| 15-<25                                          | 73  | 14 (19%)                      |                                            | 0.82 | 0.34, 1.96  |                      | 0.72 | 0.31, 1.66  |
| $\geq$ 25                                       | 78  | 50 (64%)                      |                                            | 6.39 | 2.90, 14.08 |                      | 6.12 | 2.84, 13.21 |
| <b>Gender</b>                                   |     |                               | 0.85/0.90                                  |      |             |                      |      |             |
| Female                                          | 119 | 45 (38%)                      |                                            |      |             |                      |      |             |
| Male                                            | 93  | 34 (37%)                      |                                            |      |             |                      |      |             |
| <b>Race/Ethnicity</b>                           | 197 | 72 (37%)                      | 0.44/0.67                                  |      |             |                      |      |             |
| Non-White                                       | 15  | 7 (47%)                       |                                            |      |             |                      |      |             |
| White, Non-Hispanic                             |     |                               |                                            |      |             |                      |      |             |
| <b>Duration of Diabetes (years)<sup>§</sup></b> |     |                               | <0.001/0.54                                |      |             |                      |      |             |
| < 5                                             | 47  | 12 (26%)                      |                                            |      |             |                      |      |             |
| 5-<10                                           | 64  | 17 (27%)                      |                                            |      |             |                      |      |             |
| 10-<20                                          | 54  | 20 (37%)                      |                                            |      |             |                      |      |             |
| $\geq$ 20                                       | 47  | 30 (64%)                      |                                            |      |             |                      |      |             |
| <b>Baseline Insulin Modality</b>                |     |                               | 0.04/0.07                                  |      |             | 0.25                 |      |             |
| MDI                                             | 43  | 10 (23%)                      |                                            | 1.0  |             |                      |      |             |
| Pump                                            | 169 | 69 (41%)                      |                                            | 1.76 | 0.74, 4.15  |                      |      |             |
| <b>Baseline A1c<sup>§</sup></b>                 |     |                               | 0.51/0.53                                  |      |             |                      |      |             |
| <7.0%                                           | 58  | 19 (33%)                      |                                            |      |             |                      |      |             |
| 7.0%- <8.0%                                     | 110 | 46 (42%)                      |                                            |      |             |                      |      |             |
| $\geq$ 8.0%                                     | 44  | 14 (32%)                      |                                            |      |             |                      |      |             |
| <b>Severe Hypoglycemia in Last 6 Months</b>     |     |                               | 0.02/0.008                                 |      |             | 0.01                 |      | 0.008       |
| None                                            | 190 | 76 (40%)                      |                                            | 1.0  |             |                      |      |             |
| $\geq$ 1 Episode                                | 22  | 3 (14%)                       |                                            | 0.18 | 0.05, 0.70  |                      | 0.16 | 0.04, 0.62  |

| <b>Self-Reported Home Blood Glucose Meter Measurements per Day<sup>§</sup></b> |     |          |  | 0.06/0.10 |            | 0.16 |  |
|--------------------------------------------------------------------------------|-----|----------|--|-----------|------------|------|--|
| 3-5                                                                            | 101 | 35 (35%) |  | 1.0       |            |      |  |
| 6-8                                                                            | 80  | 28 (35%) |  | 0.95      | 0.46, 1.94 |      |  |
| ≥ 9                                                                            | 31  | 16 (52%) |  | 1.82      | 0.71, 4.66 |      |  |

\*One subject had self reported use imputed for missing sensor download.

<sup>†</sup>The multivariate logistic regression model includes all variables having age-adjusted P value <0.2.

<sup>‡</sup>Multivariate logistic regression model using backward selection keeping those variables with P value < 0.05.

<sup>§</sup> P Value obtained by treating as continuous variable.

**Supplemental Table 2: CGM Use\* and Sensor Glucose Values During First 4 Weeks as Predictors of Month 6 CGM Use (N=212)**

|                                                              | N   | Sensor Use <sup>†</sup> ≥6 Days/Week During Month 6 # (%) | Odds Ratio (95% Confidence Interval) | P value <sup>‡</sup> |
|--------------------------------------------------------------|-----|-----------------------------------------------------------|--------------------------------------|----------------------|
| <b>Sensor Use During First 7 Days<sup>§</sup></b>            |     |                                                           |                                      |                      |
| 0-5                                                          | 30  | 4 (13%)                                                   | 1.0                                  | 0.004                |
| 6                                                            | 21  | 1 (5%)                                                    | 0.51 (0.05, 5.30)                    |                      |
| 7                                                            | 157 | 71 (45%)                                                  | 4.58 (1.42, 14.81)                   |                      |
| <b>Sensor Use During First 14 Days<sup>  </sup></b>          |     |                                                           |                                      |                      |
| 0-8                                                          | 16  | 2 (13%)                                                   | 1.0                                  | <0.001               |
| 9-11                                                         | 31  | 2 (6%)                                                    | 0.37 (0.04, 3.17)                    |                      |
| 12-13                                                        | 30  | 3 (10%)                                                   | 0.68 (0.09, 4.82)                    |                      |
| 14                                                           | 132 | 69 (52%)                                                  | 4.76 (0.98, 23.13)                   |                      |
| <b>Sensor Use During First 21 Days<sup>¶</sup></b>           |     |                                                           |                                      |                      |
| 0-13                                                         | 27  | 1 (4%)                                                    | 1.0                                  | <0.001               |
| 14-17                                                        | 31  | 4 (13%)                                                   | 2.68 (0.27, 27.07)                   |                      |
| 18-20                                                        | 39  | 11 (28%)                                                  | 8.15 (0.95, 69.98)                   |                      |
| 21                                                           | 113 | 61 (54%)                                                  | 16.16 (2.05, 127.46)                 |                      |
| <b>Sensor Use During First 28 Days</b>                       |     |                                                           |                                      |                      |
| 0-20                                                         | 44  | 1 (2%)                                                    | 1.0                                  | <0.001               |
| 21-23                                                        | 14  | 1 (7%)                                                    | 3.18 (0.18, 57.96)                   |                      |
| 24-26                                                        | 32  | 8 (25%)                                                   | 11.68 (1.34, 101.87)                 |                      |
| 27-28                                                        | 122 | 69 (57%)                                                  | 33.66 (4.37, 258.97)                 |                      |
| <b>Sensor Use During 15- 28 Days<sup>  </sup></b>            |     |                                                           |                                      |                      |
| 0-10                                                         | 45  | 1 (2%)                                                    | 1.0                                  | <0.001               |
| 11-13                                                        | 46  | 12 (26%)                                                  | 12.05 (1.45, 99.97)                  |                      |
| 14                                                           | 118 | 63 (53%)                                                  | 29.91 (3.87, 231.04)                 |                      |
| <b>% of Day 71-180 mg/dL During First Month<sup>#</sup></b>  |     |                                                           |                                      |                      |
| 26-<55%                                                      | 64  | 17 (27%)                                                  | 1.0                                  | 0.22                 |
| 55-<70%                                                      | 94  | 35 (37%)                                                  | 1.65 (0.70, 3.92)                    |                      |
| 70-89%                                                       | 53  | 27 (51%)                                                  | 1.20 (0.44, 3.31)                    |                      |
| <b>% of Day &lt;70 mg/dL During First Month<sup>#</sup></b>  |     |                                                           |                                      |                      |
| 5-26%                                                        | 71  | 20 (28%)                                                  | 1.0                                  | 0.05                 |
| 2-<5%                                                        | 62  | 23 (37%)                                                  | 2.02 (0.82, 4.94)                    |                      |
| 0-<2%                                                        | 78  | 36 (46%)                                                  | 1.17 (0.48, 2.86)                    |                      |
| <b>% of Day &gt;180 mg/dL During First Month<sup>#</sup></b> |     |                                                           |                                      |                      |
| 40-73%                                                       | 68  | 19 (28%)                                                  | 1.0                                  | 0.53                 |
| 25-<40%                                                      | 89  | 33 (37%)                                                  | 1.48 (0.56, 3.96)                    |                      |
| 4-<25%                                                       | 54  | 27 (50%)                                                  | 1.06 (0.44, 2.54)                    |                      |

\* CGM use was calculated by taking the average of the days with available downloads.

<sup>†</sup> One subject had self reported use imputed for missing sensor download.

<sup>‡</sup> P Values are from logistic regression model treating CGM use as continuous variable, adjusting for age and whether subject had a severe hypoglycemic event in the 6 months prior to baseline. Categories were created for presentation purposes.

<sup>§</sup> 4 Subjects are missing sensor data.

<sup>||</sup> 3 Subjects are missing sensor data.

<sup>¶</sup> 2 Subjects are missing sensor data.

<sup>#</sup> One subject is missing glucose data because at least 24 hours of glucose data was required to be included in analysis.

**Supplemental Table 3: CGM Use During First 4 Weeks as Predictor of Month 6 CGM Use\* by Age Group (N=212)**

|                                        | N  | ≥ 6 Days/Wk in Month 6<br>#(%) |
|----------------------------------------|----|--------------------------------|
| <b>Sensor Use During First 28 Days</b> |    |                                |
| <b>Age ≥25</b>                         |    |                                |
| 7-20 Days                              | 5  | 1 (20%)                        |
| 21-23 Days                             | 2  | 0                              |
| 24-26 Days                             | 7  | 3 (43%)                        |
| 27-28 Days                             | 64 | 46 (72%)                       |
| <b>Age 15-&lt;25</b>                   |    |                                |
| 7-20 Days                              | 25 | 0                              |
| 21-23 Days                             | 8  | 1 (13%)                        |
| 24-26 Days                             | 13 | 4 (31%)                        |
| 27-28 Days                             | 27 | 9 (33%)                        |
| <b>Age 8-&lt;15</b>                    |    |                                |
| 7-20 Days                              | 14 | 0                              |
| 21-23 Days                             | 4  | 0                              |
| 24-26 Days                             | 12 | 1 (8%)                         |
| 27-28 Days                             | 31 | 14 (45%)                       |

\*One subject had self reported use imputed for missing sensor download.

**Supplemental Table 4. Glycemic Indices\* Stratified by Daytime vs. Nighttime† (Website)**

|                                  | Age ≥25 Years                 |                |                               |                | Age 15-24 Years               |                |                               |                | Age 8-14 ears                 |                |                               |                |
|----------------------------------|-------------------------------|----------------|-------------------------------|----------------|-------------------------------|----------------|-------------------------------|----------------|-------------------------------|----------------|-------------------------------|----------------|
|                                  | Day                           |                | Night                         |                | Day                           |                | Night                         |                | Day                           |                | Night                         |                |
|                                  | <i>Baseline<br/>(Blinded)</i> | <i>Month 6</i> |
|                                  | <b>N = 74</b>                 | <b>N = 73</b>  | <b>N = 74</b>                 | <b>N = 73</b>  | <b>N = 55</b>                 | <b>N = 55</b>  | <b>N = 55</b>                 | <b>N = 55</b>  | <b>N = 44</b>                 | <b>N = 44</b>  | <b>N = 44</b>                 | <b>N = 44</b>  |
| Mean Glucose mg/dL)              | 157 ± 25                      | 152 ± 19       | 158 ± 35                      | 154 ± 22       | 166 ± 31                      | 174 ± 31       | 162 ± 34                      | 169 ± 33       | 172 ± 29                      | 169 ± 28       | 170 ± 38                      | 170 ± 33       |
| Min/Day 71-180<br>mg/dL-Median   | 691                           | 735            | 205                           | 230            | 628                           | 578            | 198                           | 199            | 605                           | 624            | 180                           | 204            |
| <b>Hypoglycemia-<br/>Median</b>  |                               |                |                               |                |                               |                |                               |                |                               |                |                               |                |
| Min/Day ≤70 mg/dL                | 41                            | 32             | 12                            | 11             | 67                            | 40             | 25                            | 10             | 33                            | 32             | 7                             | 4              |
| Min/Day ≤60 mg/dL                | 15                            | 12             | 2                             | 4              | 28                            | 16             | 12                            | 4              | 14                            | 8              | 0                             | 0              |
| Min/Day ≤50 mg/dL                | 4                             | 3              | 0                             | 1              | 9                             | 2              | 0                             | 0              | 0                             | 1              | 0                             | 0              |
| Area under the Curve‡            | 0.3                           | 0.2            | 0.2                           | 0.3            | 0.6                           | 0.3            | 0.6                           | 0.3            | 0.3                           | 0.2            | 0.1                           | 0.0            |
| LBGI§                            | 0.9                           | 0.8            | 0.8                           | 0.8            | 1.1                           | 0.9            | 1.4                           | 0.8            | 0.9                           | 0.8            | 0.5                           | 0.6            |
| <b>Hyperglycemia-<br/>Median</b> |                               |                |                               |                |                               |                |                               |                |                               |                |                               |                |
| Min/Day>180 mg/dL                | 309                           | 280            | 118                           | 110            | 384                           | 454            | 119                           | 136            | 420                           | 425            | 152                           | 143            |
| Min/Day>200 mg/dL                | 202                           | 180            | 84                            | 76             | 278                           | 342            | 83                            | 95             | 334                           | 329            | 122                           | 104            |
| Min/Day>250 mg/dL                | 84                            | 53             | 21                            | 17             | 115                           | 135            | 44                            | 34             | 167                           | 138            | 48                            | 51             |
| Area under the Curve             | 14.8                          | 11.4           | 13.6                          | 13.1           | 20.4                          | 24.3           | 19.4                          | 21.4           | 25.4                          | 22.1           | 26.4                          | 24.5           |
| HBGI¶                            | 7.0                           | 5.6            | 6.9                           | 6.6            | 8.2                           | 9.9            | 8.2                           | 7.8            | 9.7                           | 8.8            | 9.7                           | 8.9            |

\*Subjects had to have at least 18 hours of glucose data to be included in daytime analysis and 6 hours for nighttime analysis.

†Night time was defined as the hours between 12 AM and 6 AM.

‡Total area below 70 mg/dL; reflects both percentage and severity of glucose values in the hypoglycemic range.

§Low Blood Glucose Index (13).

||Total area above 180 mg/dL; reflects both percentage and severity of glucose values in the hyperglycemic range.

¶High Blood Glucose Index (13).

**Supplemental Table 5. Glycemic Indices\* Stratified by Baseline A1c (Website)**

| Age ≥25 Years                     |                                  |                   |         |                                 |                   |         |
|-----------------------------------|----------------------------------|-------------------|---------|---------------------------------|-------------------|---------|
|                                   | A1c <7.0%                        |                   |         | A1c ≥7.0%                       |                   |         |
|                                   | Baseline<br>(Blinded)*<br>N = 27 | Month 6<br>N = 27 | P value | Baseline<br>(Blinded)<br>N = 47 | Month 6<br>N = 47 | P Value |
| Mean Glucose (mg/dL)              | 142 ± 25                         | 144 ± 18          |         | 165 ± 21                        | 157 ± 17          |         |
| Min/Day 71-180 mg/dL -Median      | 946                              | 1019              | 0.06    | 863                             | 967               | 0.001   |
| <b>Hypoglycemia-Median</b>        |                                  |                   |         |                                 |                   |         |
| Min/Day ≤70 mg/dL                 | 104                              | 80                | 0.005   | 35                              | 39                | 0.44    |
| Min/Day ≤60 mg/dL                 | 45                               | 32                |         | 10                              | 10                |         |
| Min/Day ≤50 mg/dL                 | 12                               | 9                 |         | 4                               | 3                 |         |
| Area over the Curve <sup>†</sup>  | 0.8                              | 0.5               |         | 0.2                             | 0.2               |         |
| LBG1 <sup>‡</sup>                 | 1.9                              | 1.3               |         | 0.7                             | 0.7               |         |
| <b>Hyperglycemia-Median</b>       |                                  |                   |         |                                 |                   |         |
| Min/Day >180 mg/dL                | 300                              | 328               | 0.85    | 541                             | 415               | 0.009   |
| Min/Day >200 mg/dL                | 219                              | 218               |         | 348                             | 286               |         |
| Min/Day >250 mg/dL                | 82                               | 56                |         | 133                             | 86                |         |
| Area under the Curve <sup>§</sup> | 12.2                             | 10.3              |         | 17.5                            | 13.6              |         |
| HBGI <sup>  </sup>                | 5.2                              | 5.0               |         | 7.7                             | 6.3               |         |
| Age 15-24 Years                   |                                  |                   |         |                                 |                   |         |
|                                   | N = 13                           | N = 13            |         | N =42                           | N =42             |         |
| Mean Glucose (mg/dL)              | 145 ± 23                         | 154 ± 27          |         | 171 ± 26                        | 179 ± 26          |         |
| Min/Day 71-180 mg/dL -Median      | 995                              | 949               | 0.68    | 816                             | 755               | 0.16    |
| <b>Hypoglycemia-Median</b>        |                                  |                   |         |                                 |                   |         |
| Min/Day ≤70 mg/dL                 | 134                              | 86                | 0.22    | 83                              | 51                | 0.008   |
| Min/Day ≤60 mg/dL                 | 66                               | 26                |         | 46                              | 19                |         |
| Min/Day ≤50 mg/dL                 | 32                               | 6                 |         | 18                              | 2                 |         |
| Area over the Curve <sup>†</sup>  | 1.2                              | 0.5               |         | 0.7                             | 0.3               |         |
| LBG1 <sup>‡</sup>                 | 2.5                              | 1.4               |         | 1.4                             | 0.9               |         |
| <b>Hyperglycemia-Median</b>       |                                  |                   |         |                                 |                   |         |
| Min/Day >180 mg/dL                | 397                              | 325               | 0.54    | 529                             | 589               | 0.04    |
| Min/Day >200 mg/dL                | 273                              | 233               |         | 415                             | 454               |         |
| Min/Day >250 mg/dL                | 106                              | 80                |         | 170                             | 229               |         |
| Area under the Curve <sup>§</sup> | 12.3                             | 11.5              |         | 23.1                            | 27.0              |         |
| HBGI <sup>  </sup>                | 5.4                              | 5.0               |         | 8.7                             | 10.3              |         |
| Age 8-14 Years                    |                                  |                   |         |                                 |                   |         |
|                                   | N =12                            | N =12             |         | N =32                           | N =32             |         |
| Mean Glucose (mg/dL)              | 161 ± 33                         | 158 ± 35          |         | 176 ± 27                        | 173 ± 25          |         |
| Min/Day 71-180 mg/dL -Median      | 841                              | 814               | 0.47    | 797                             | 812               | 0.29    |
| <b>Hypoglycemia-Median</b>        |                                  |                   |         |                                 |                   |         |
| Min/Day ≤70 mg/dL                 | 74                               | 50                | 0.85    | 54                              | 33                | 0.58    |
| Min/Day ≤60 mg/dL                 | 27                               | 15                |         | 18                              | 10                |         |
| Min/Day ≤50 mg/dL                 | 2                                | 2                 |         | 2                               | 1                 |         |
| Area over the Curve <sup>†</sup>  | 0.4                              | 0.2               |         | 0.3                             | 0.2               |         |
| LBG1 <sup>‡</sup>                 | 1.0                              | 1.1               |         | 0.9                             | 0.7               |         |

| <b>Hyperglycemia-Median</b>       |      |      |      |      |      |      |
|-----------------------------------|------|------|------|------|------|------|
| Min/Day >180 mg/dL                | 397  | 459  | 0.38 | 572  | 568  | 0.63 |
| Min/Day >200 mg/dL                | 288  | 371  |      | 474  | 452  |      |
| Min/Day >250 mg/dL                | 97   | 130  |      | 227  | 202  |      |
| Area under the Curve <sup>§</sup> | 13.1 | 17.5 |      | 27.8 | 24.5 |      |
| HBGI <sup>  </sup>                | 5.7  | 7.4  |      | 10.4 | 9.6  |      |

\*Subjects had to have at least 24 hours of glucose data to be included in analysis.

†Total area below 70 mg/dL; reflects both percentage and severity of glucose values in the hypoglycemic range.

‡Low Blood Glucose Index (13).

§Total area above 180 mg/dL; reflects both percentage and severity of glucose values in the hyperglycemic range.

||High Blood Glucose Index (13).



## Disclosure

Financial support: Study funding was provided by the Juvenile Diabetes Research Foundation, Inc. (grant numbers 22-2006-1107, 22-2006-1117, 22-2006-1112, 22-2006-1123, and 01-2006-8031).

Continuous glucose monitors and sensors were purchased at a bulk discount price from DexCom, Inc. (San Diego, CA), Medtronic MiniMed, Inc. (Northridge, CA), and Abbott Diabetes Care, Inc. (Alameda, CA.). Home glucose meters and test strips were provided to the study by LifeScan, Inc. and Abbott Diabetes Care, Inc. The companies had no involvement in the design, conduct, or analysis of the trial or the manuscript preparation.

Below is a listing of relationships of the investigators with companies that make products relevant to the manuscript between July 1, 2006 and Present. Research funds were listed below were provided to the legal entity that employs the individual and not directly to the individual.

Jennifer M. Block, RN, CDE reports having received honoraria from Abbott Diabetes Care, Inc. and Medtronic MiniMed, Inc., and serving on a medical advisory board for Tandem Inc. And Arkal Medical; Dr. Bode reports having received consulting fees, honoraria, travel reimbursement, and research funds from Abbott Diabetes Care, Inc., and Medtronic MiniMed, Inc., and grant support from DexCom, Inc.; Dr. Buckingham reports having received a speaker honorarium and research funding from Abbott Diabetes Care, Inc., a fee for serving on a medical advisory board for Lifescan, Inc., a speaker honorarium, consulting fees, and research funding from Medtronic MiniMed, Inc., and a consulting fee from Novo Nordisk, Inc.; Dr. Chase reports having received a speaker honorarium from Abbott Diabetes Care, Inc. and Sanofi-Aventis, and grant support from Symlin; Dr. Fiallo-Scharerer reports having received supplies for research from Abbott Diabetes Care, Inc. and Medtronic MiniMed, Inc.; Dr. Fox reports having received supplies for research from Abbott Diabetes Care, Inc. and Smiths Medical; Dr. Hirsch reports having received consulting fees and travel reimbursement from Abbott Diabetes Care, Inc., and grant support from Medtronic MiniMed, Inc.; Dr. Kollman reports having received consulting fees from Medtronic MiniMed, Inc.; Kerry Milaszewski, RN, CDE reports having received consulting fees from Medtronic MiniMed, Inc.; Dr. Laffel reports having received consulting fees from Lifescan, Inc., consulting fees and a speaker honorarium from Abbott Diabetes Care, Inc., consulting fees and research funding from Medtronic MiniMed, Inc., and consulting and speaker fees from Roche; Dr. Mauras reports having received grant support from Medtronic MiniMed, Inc.; Dr. Tamborlane reports having received consulting fees from Abbott Diabetes Care, Inc. and Lifescan, Inc. and consulting fees, a speaker honorarium, and research funding from Medtronic MiniMed, Inc.; Dr. Weinzimer reports having received research support, a speaker honorarium and travel reimbursement from Medtronic MiniMed, Inc., and a speaker honorarium from Animas Corp / Lifescan, Inc.; Dr. Wolpert reports having received consulting fees from Abbott Diabetes Care, Inc. and research funding from Medtronic MiniMed, Inc.; Dr. Wilson reports having received equipment and software from Abbott Diabetes Care, Inc. and Medtronic MiniMed, Inc. and research support from Medtronic MiniMed, Inc. and The Elizabeth Glaser Pediatric AIDS Foundation.

*The Juvenile Diabetes Research Foundation Continuous Glucose Monitoring Study Group*

*Clinical Centers:* Listed in order of number of patients enrolled with clinical center name, city, and state. Personnel are listed as (PI) for Principal Investigator, (I) for co-Investigator and (C) for Coordinators:

*Diabetes Care Center, University of Washington, Seattle, WA:* Irl B. Hirsch, M.D. (PI); Lisa K. Gilliam, M.D., Ph.D. (I); Kathy Fitzpatrick, R.N., M.N., C.D.E. (C); Dori Khakpour, R.D., C.D., C.D.E. (C); *Department of Pediatrics, Yale University School of Medicine, New Haven, CT:* Stuart A. Weinzimer, M.D. (PI); William V. Tamborlane, M.D. (I); Brett Ives, M.S.N., A.P.R.N. (C); Joan Bosson-Heenan (C); *Adult Section, Joslin Diabetes Center, Boston, MA:* Howard Wolpert, M.D. (PI); Greeshma Shetty, M.D. (I); Astrid Atakov-Castillo (C); Judith Giusti, M.S., R.D., L.D.N., C.D.E. (C); Stacey O'Donnell, R.N., C.D.E. (C); Suzanne Ghiloni, R.N., C.D.E. (C); *Atlanta Diabetes Associates, Atlanta, GA:* Bruce W. Bode, M.D. (PI); Kelli O'Neil, C.D.E. (C); Lisa Tolbert, R.N., M.N., C.D.E. (C); *Nemours Children's Clinic, Jacksonville, FL:* Tim Wysocki, Ph.D. (co-PI); Larry A. Fox, M.D. (co-PI); Nelly Mauras, M.D. (I); Kimberly Englert, R.N. (C); Joe Permuy, M.S.N., A.R.N.P. (C); *Division of Pediatric Endocrinology and Diabetes, Stanford University, Stanford, CA:* Bruce Buckingham, M.D. (PI); Darrell M. Wilson, M.D. (I); Jennifer Block, R.N., C.D.E. (C); Kari Benassi, R.N., N.P. (C); *Department of Pediatrics, University of Iowa Carver College of Medicine, Iowa City, IA:* Eva Tsalikian, M.D. (PI); Michael Tansey, M.D. (I); Debra Kucera, A.R.N.P., C.P.N.P. (C); Julie Coffey, A.R.N.P., C.P.N.P. (C); Joanne Cabbage (C); *Pediatric Adolescent, and Young Adult Section, Joslin Diabetes Center, Boston, MA:* Lori Laffel, M.D., M.P.H., (PI), Kerry Milaszewski, R.N., C.D.E. (C); Katherine Pratt (C); Elise Bismuth, M.D., M.S., (C); Joyce Keady, M.S.N., C.P.N.P. (C); Margie Lawlor, M.S., C.D.E. (C); *Barbara Davis Center for Childhood Diabetes, University of Colorado, Denver, CO:* H. Peter Chase, M.D. (PI); Rosanna Fiallo-Scharer, M.D. (I); Paul Wadwa, M.D. (I); Laurel Messer, R.N., C.D.E. (C); Victoria Gage, R.N. (C); Patricia Burdick (C); *Departments of Pediatric Endocrinology and Research and Evaluation, Kaiser Permanente, San Diego and Pasadena, CA:* Jean M. Lawrence, Sc.D., M.P.H., M.S.S.A. (co-PI); Robert Clemons, M.D. (co-PI); Michelle Maeva, R.N., C.D.E. (C); Bonnie Sattler, M.S., R.D. (C); *Coordinating Center:* Jaeb Center for Health Research, Tampa, FL: Roy W. Beck, M.D., Ph.D.; Katrina J. Ruedy, M.S.P.H.; Craig Kollman, Ph.D.; Dongyuan Xing, M.P.H.; Judy Jackson *University of Minnesota Central Laboratory:* Michael Steffes, M.D., Ph.D., Jean M. Bucksa, C.L.S., Maren L. Nowicki, C.L.S., Carol Van Hale, C.L.S., Vicky Makky, C.L.S.

*Cost-effectiveness investigators: National Opinion Research Center, University of Chicago:* Michael O'Grady, Ph.D.; Elbert Huang, M.D., M.P.H.; Anirban Basu, Ph.D.; David O. Meltzer, M.D., Ph.D.; Lan Zhao, Ph.D. *University of Michigan:* Joyce Lee, M.D., M.P.H.

*Juvenile Diabetes Research Foundation, Inc.:* Aaron J. Kowalski, Ph.D.

*Operations Committee:* Lori Laffel, M.D., M.P.H. (co-chair), William V. Tamborlane, M.D. (co-chair), Roy W. Beck, M.D., Ph.D., Aaron J. Kowalski, Ph.D., Katrina J. Ruedy, M.S.P.H.

*Data and Safety Monitoring Board:* Ruth S. Weinstock, M.D., Ph.D. (chair), Barbara J Anderson, Ph.D.; Davida Kruger, M.S.N., A.P.R.N.; Lisa LaVange, Ph.D.; Henry Rodriguez, M.D.
